# Supplementary material for: A federated graph learning method to multi-party collaboration for molecular discovery
Source: Research Square preprint supplement (doi:10.21203/rs.3.rs-5546931/v1), 2024-12-22
Supplement: Supplementary file 1 [file 0b7df6409bd817ba94bd4bdc.docx]

**Supplementary Information**

**A federated graph learning method to multi-party collaboration for molecular discovery**

Liang Zhang1, 2, 3, Yanyong Zhang4, Kong Chen1, 2, 3, *, Jun Jiang1, 5, * and Yu-En Wu1, 2, 3, *

1Key Laboratory of Precision and Intelligent Chemistry/School of Chemistry and Materials Science, University of Science and Technology of China, Hefei, China.

2National Key Laboratory of Deep Space Exploration, Deep Space Exploration Laboratory, Hefei, China.

3Department of Endocrinology, Institute of Endocrine and Metabolic Diseases, The First Affiliated Hospital of USTC, Division of Life Sciences and Medicine, University of Science and Technology of China, Hefei, China.

4School of AI and Data Science, University of Science and Technology of China, Hefei, China.

5Hefei National Laboratory, University of Science and Technology of China, Hefei, China.

*Corresponding authors. E-mail: [yuenwu@ustc.edu.cn](mailto:yuenwu@ustc.edu.cn); [jiangj1@ustc.edu.cn](mailto:jiangj1@ustc.edu.cn); [kongchen@ustc.edu.cn](mailto:kongchen@ustc.edu.cn)

**Table of Contents**

[**Table of Contents** 2](#_Toc181180888)

[**Supplementary Note 1** 3](#_Toc181180889)

[**Supplementary Note 2** 4](#_Toc181180890)

[**Supplementary Table 1** 5](#_Toc181180891)

[**Supplementary Table 2** 6](#_Toc181180892)

[**Supplementary Table 3** 7](#_Toc181180893)

[**Supplementary Table 4** 8](#_Toc181180894)

[**Supplementary Table 5** 9](#_Toc181180895)

[**Supplementary Table 6** 10](#_Toc181180896)

[**Supplementary Table 7** 11](#_Toc181180897)

[**Supplementary Table 8** 12](#_Toc181180898)

[**Supplementary Table 9** 13](#_Toc181180899)

[**Supplementary Table 10** 14](#_Toc181180900)

[**Supplementary Table 11** 15](#_Toc181180901)

[**Supplementary Table 12** 16](#_Toc181180902)

[**Supplementary Table 13** 17](#_Toc181180902)

[**Supplementary Table 14** 18](#_Toc181180902)

[**Supplementary Table 15** 19](#_Toc181180902)

[**References** 20](#_Toc181180902)**Supplementary Note 1**

We selected 5 molecular classification datasets and 3 molecular regression datasets from MoleculeNet1 as the benchmarks. These benchmarks include different categories of bioactivity, pharmacokinetics, toxicity and physical-chemistry property. BBBP includes 2053 molecules with measured permeability property of penetrating the blood-brain barrier. BACE is a dataset with 1522 compounds including quantitative (IC50) and qualitative binding results for a set of inhibitors of human β-secretase 1. SIDER contains marketed drugs and adverse drug reactions, categorized into 27 system organ classes for 1427 approved drugs. Tox21 contains 8014 toxic compounds measured on 12 different targets, including nuclear receptors and stress response pathways. ToxCast is another toxicity database that contains high-throughput screening results with 8615 compounds. ESOL consists of water solubility data (log solubility in mols per liter) for 1128 common organic small molecules. Lipophilicity (Lipo) contains the experimental results of the octanol or water partition coefficient of 4200 compounds. FreeSolv is a database of the experimental hydration free energies of 643 small molecules in water. LIT-PCBA2 is a specifically designed dataset for virtual screening of 7844 confirmed activate compounds and 407381 confirmed inactivate compounds toward 15 protein targets, and we used 7 datasets based on the number of positive and negative samples, which were binary classification task. DrugBank3 is a large database of 1850 approved drugs with 221523 DDI positive labels and chemical structure (SMILES). BIOSNAP4 consists 1322 approved drugs with 41520 labelled DDIs. CoCrystal5 that contains 6819 positive samples selected from Cambridge Structural Database (CSD)6 and 1052 negative samples reported by experiments, which are cocrystal molecules. DrugBank, BIOSNAP and CoCrystal are also binary classification tasks. Detailed dataset summary is provided in Supplementary Table 15.

**Supplementary Note 2**

In our experiments, the steps of message passing for MPNN7, GAT8 and GCN9 are uniformly set to 3. We employ the Adam optimizer10 with a learning rate of 10⁻³ and a weight decay of 10⁻⁵. The batch size is set to 32. The global training round is set to 100, the local training epoch is set to 5, thus the communication round is 20 for the whole federated communication. The concentration parameter is set to a very small value of 0.1 in Dirichlet distribution. We scale the Laplacian distribution based on clip values of 0.5, 1.0, 1.5 and 2.0, while adjusting the noise rates for label change to 0.1, 0.15, 0.2. Clip values of 1.0, 1.5, and 2.0 are used to evaluate the robustness of FedLG method by varying the clip values for private institutional database, while the open-access database maintains a clip value of 0.5. Additionally, when assessing the impact of the noise rate of label change on model robustness, the open-access database is set with no noise rate. For Bayesian optimization, we set the parameter space of the number of iterations from 8 to 256, and the step of function evaluation to 100. All experiments were conducted on an NVIDIA RTX 4090 GPU within a 64-bit CentOS v8.0 server equipped with 512 GB of RAM.

**Supplementary Table 1.** Performance comparison on molecular property prediction task using the GAT model.

| **Metrics** | **AUC** | | | | | **RMSE** | | |
| --- | --- | --- | --- | --- | --- | --- | --- | --- |
| **Dataset** | **BBBP** | **BACE** | **SIDER** | **Tox21** | **ToxCast** | **ESOL** | **Lipo** | **FreeSolv** |
| FedAvg | 0.582 (0.084) | 0.571 (0.072) | 0.513 (0.005) | 0.508 (0.046) | 0.506 (0.004) | - | - | - |
| FedAdam | 0.441 (0.019) | 0.581 (0.026) | 0.498 (0.011) | 0.553 (0.024) | 0.498 (0.003) | 3.623 (0.213) | 2.515 (0.021) | 5.165 (0.001) |
| FedSGD | 0.332 (0.031) | 0.681 (0.021) | 0.503 (0.010) | 0.594 (0.012) | 0.503 (0.004) | 3.761 (0.143) | 2.313 (0.029) | 5.843(0.182) |
| FedProx | 0.558 (0.086) | 0.575 (0.067) | 0.512 (0.004) | 0.519 (0.049) | 0.501 (0.002) | - | - | - |
| FLIT | 0.588 (0.082) | 0.572 (0.017) | 0.515 (0.006) | 0.502 (0.045) | 0.506 (0.003) | - | - | - |
| FedLG | **0.836 (0.008)** | **0.736 (0.015)** | **0.612 (0.006)** | **0.762 (0.007)** | **0.738 (0.012)** | **0.974 (0.148)** | **0.978 (0.058)** | **2.254 (0.161)** |

| **Metrics** | **AUC** | | | | | **RMSE** | | |
| --- | --- | --- | --- | --- | --- | --- | --- | --- |
| **Dataset** | **BBBP** | **BACE** | **SIDER** | **Tox21** | **ToxCast** | **ESOL** | **Lipo** | **FreeSolv** |
| FedAvg | 0.598 (0.060) | 0.492 (0.159) | 0.514 (0.012) | 0.529 (0.051) | 0.508 (0.007) | - | - | - |
| FedAdam | 0.437 (0.020) | 0.581 (0.052) | 0.507 (0.017) | 0.553 (0.028) | 0.500 (0.002) | 3.623 (0.050) | 2.515 (0.016) | 5.165 (0.111) |
| FedSGD | 0.405 (0.012) | 0.669 (0.020) | 0.505 (0.010) | 0.600 (0.013) | 0.503 (0.014) | 3.752 (0.213) | 2.425 (0.016) | 5.621 (0.111) |
| FedProx | 0.589 (0.059) | 0.494 (0.148) | 0.513 (0.011) | 0.526 (0.051) | 0.501 (0.005) | - | - | - |
| FLIT | 0.603 (0.051) | 0.486 (0.151) | 0.513 (0.011) | 0.518 (0.026) | 0.507 (0.007) | - | - | - |
| FedLG | **0.848 (0.023)** | **0.730 (0.010)** | **0.607 (0.012)** | **0.756 (0.012)** | **0.730 (0.011)** | **0.888 (0.070)** | **1.010 (0.023)** | **2.240 (0.309)** |

**Supplementary Table 2.** Performance comparison on molecular property prediction task using the GCN model.

**Supplementary Table 3.** Performance comparison on virtual screening of protein targets task using the GAT model.

| **Metrics** | **AUC** | | | | | | |
| --- | --- | --- | --- | --- | --- | --- | --- |
| **Dataset** | **ALDH1** | **FEN1** | **GBA** | **KAT2A** | **MAPK1** | **PKM2** | **VDR** |
| FedAvg | 0.582 (0.028) | 0.667 (0.025) | 0.662 (0.037) | 0.542 (0.019) | 0.629 (0.013) | 0.646 (0.017) | 0.625 (0.017) |
| FedAdam | 0.588 (0.025) | 0.486 (0.045) | 0.670 (0.019) | 0.550 (0.013) | 0.599 (0.029) | 0.555 (0.014) | 0.408 (0.021) |
| FedSGD | 0.593 (0.027) | 0.647 (0.034) | 0.711 (0.029) | 0.540 (0.021) | 0.607 (0.026) | 0.579 (0.009) | 0.595 (0.014) |
| FedProx | 0.586 (0.040) | 0.574 (0.033) | 0.673 (0.012) | 0.532 (0.025) | 0.626 (0.013) | 0.611 (0.032) | 0.623 (0.019) |
| FLIT | 0.583 (0.054) | 0.660 (0.032) | 0.673 (0.034) | 0.511 (0.022) | 0.616 (0.021) | 0.651 (0.024) | 0.639 (0.023) |
| FedLG | **0.724 (0.024)** | **0.860 (0.011)** | **0.752 (0.016)** | **0.615 (0.019)** | **0.723 (0.026)** | **0.726 (0.033)** | **0.758 (0.048)** |

**Supplementary Table 4.** Performance comparison on virtual screening of protein targets task using the GCN model.

| **Metrics** | **AUC** | | | | | | |
| --- | --- | --- | --- | --- | --- | --- | --- |
| **Dataset** | **ALDH1** | **FEN1** | **GBA** | **KAT2A** | **MAPK1** | **PKM2** | **VDR** |
| FedAvg | 0.585 (0.034) | 0.646 (0.011) | 0.670 (0.011) | 0.510 (0.008) | 0.614 (0.015) | 0.674 (0.019) | 0.625 (0.015) |
| FedAdam | 0.587 (0.009) | 0.488 (0.040) | 0.669 (0.014) | 0.547 (0.029) | 0.593 (0.038) | 0.550 (0.017) | 0.409 (0.007) |
| FedSGD | 0.588 (0.031) | 0.603 (0.026) | 0.712 (0.020) | 0.544 (0.022) | 0.606 (0.027) | 0.542 (0.051) | 0.406 (0.011) |
| FedProx | 0.585 (0.019) | 0.585 (0.031) | 0.679 (0.014) | 0.532 (0.028) | 0.614 (0.032) | 0.613 (0.018) | 0.624 (0.035) |
| FLIT | 0.582 (0.027) | 0.664 (0.016) | 0.563 (0.035) | 0.533 (0.028) | 0.612 (0.013) | 0.638 (0.017) | 0.630 (0.019) |
| FedLG | **0.731 (0.012)** | **0.868 (0.017)** | **0.764 (0.025)** | **0.604 (0.016)** | **0.702 (0.024)** | **0.737 (0.018)** | **0.785 (0.027)** |

**Supplementary Table 5.** Performance comparison on DDI and cocrystal material formation prediction tasks using the GAT model.

| **Metrics** | **AUC** | | |
| --- | --- | --- | --- |
| **Dataset** | **DrugBank** | **BIOSNAP** | **CoCrystal** |
| FedAvg | 0.487 (0.028) | 0.624 (0.018) | 0.688 (0.019) |
| FedAdam | 0.526 (0.026) | 0.509 (0.009) | 0.701 (0.013) |
| FedSGD | 0.523 (0.033) | 0.534 (0.021) | 0.734 (0.028) |
| FedProx | 0.512 (0.051) | 0.618 (0.018) | 0.685 (0.034) |
| FLIT | 0.564 (0.038) | 0.607 (0.018) | 0.690 (0.016) |
| FedLG | **0.790 (0.031)** | **0.842 (0.022)** | **0.919 (0.008)** |

**Supplementary Table 6.** Performance comparison on DDI and cocrystal material formation prediction tasks using the GCN model.

| **Metrics** | **AUC** | | |
| --- | --- | --- | --- |
| **Dataset** | **DrugBank** | **BIOSNAP** | **CoCrystal** |
| FedAvg | 0.508 (0.020) | 0.581 (0.012) | 0.667 (0.014) |
| FedAdam | 0.523 (0.008) | 0.531 (0.038) | 0.689 (0.017) |
| FedSGD | 0.506 (0.013) | 0.547 (0.013) | 0.730 (0.025) |
| FedProx | 0.522 (0.032) | 0.571 (0.008) | 0.686 (0.032) |
| FLIT | 0.527 (0.031) | 0.589 (0.031) | 0.670 (0.008) |
| FedLG | **0.805 (0.018)** | **0.845 (0.010)** | **0.917 (0.005)** |

**Supplementary Table 7.** Robustness evaluation of performance comparison on molecular property prediction, virtual screening of protein targets and cocrystal material formation prediction tasks using the GAT model.

| **Metrics** | | **AUC** | | |
| --- | --- | --- | --- | --- |
| **Dataset** | | **BBBP** | **FEN1** | **CoCrystal** |
| Noise ratio | 10% | 0.830 (0.009) | 0.858 (0.001) | 0.914 (0.008) |
| 15% | 0.827 (0.011) | 0.848 (0.003) | 0.915 (0.010) |
| 20% | 0.829 (0.009) | 0.856 (0.008) | 0.917 (0.011) |
| Clip value | 1.0 | 0.829 (0.013) | 0.857 (0.004) | 0.909 (0.012) |
| 1.5 | 0.824 (0.002) | 0.854 (0.004) | 0.906 (0.015) |
| 2.0 | 0.823 (0.011) | 0.852 (0.009) | 0.905 (0.012) |

**Supplementary Table 8.** Robustness evaluation of performance comparison on molecular property prediction, virtual screening of protein targets and cocrystal material formation prediction tasks using the GCN model.

| **Metrics** | | **AUC** | | |
| --- | --- | --- | --- | --- |
| **Dataset** | | **BBBP** | **FEN1** | **CoCrystal** |
| Noise ratio | 10% | 0.843 (0.008) | 0.867 (0.004) | 0.916 (0.010) |
| 15% | 0.842 (0.011) | 0.866 (0.005) | 0.913 (0.008) |
| 20% | 0.840 (0.010) | 0.864 (0.012) | 0.912 (0.004) |
| Clip value | 1.0 | 0.847 (0.012) | 0.863 (0.002) | 0.906 (0.002) |
| 1.5 | 0.838 (0.012) | 0.862 (0.002) | 0.906 (0.001) |
| 2.0 | 0.835 (0.007) | 0.860 (0.014) | 0.897 (0.006) |

**Supplementary Table 9.** Effectiveness evaluation on molecular property prediction, virtual screening of protein targets and cocrystal material formation prediction tasks using the MPNN model with multiple local models and global model (FedLG method).

| **Metrics** | **AUC** | | |
| --- | --- | --- | --- |
| **Dataset** | **BBBP** | **FEN1** | **CoCrystal** |
| Private local model 1 | 0.362 (0.025) | 0.511 (0.098) | 0.534 (0.069) |
| Private local model 2 | 0.350 (0.031) | 0.441 (0.050) | 0.544 (0.060) |
| Private local model 3 | 0.409 (0.027) | 0.506 (0.057) | 0.559 (0.059) |
| Public local model | 0.857 (0.019) | 0.870 (0.004) | 0.932 (0.010) |
| FedLG (global model) | 0.869 (0.024) | 0.905 (0.019) | 0.943 (0.009) |

**Supplementary Table 10.** Effectiveness evaluation on molecular property prediction, virtual screening of protein targets and cocrystal material formation prediction tasks using the GAT model with multiple local models and global model (FedLG method).

| **Metrics** | **AUC** | | |
| --- | --- | --- | --- |
| **Dataset** | **BBBP** | **FEN1** | **CoCrystal** |
| Private local model 1 | 0.543 (0.135) | 0.511 (0.009) | 0.525 (0.190) |
| Private local model 2 | 0.529 (0.129) | 0.518 (0.013) | 0.528 (0.191) |
| Private local model 3 | 0.557 (0.146) | 0.510 (0.114) | 0.528 (0.187) |
| Public local model | 0.828 (0.004) | 0.855 (0.017) | 0.907 (0.010) |
| FedLG (global model) | 0.836 (0.005) | 0.860 (0.011) | 0.919 (0.008) |

**Supplementary Table 11.** Effectiveness evaluation on molecular property prediction, virtual screening of protein targets and cocrystal material formation prediction tasks using the GCN model with multiple local models and global model (FedLG method).

| **Metrics** | **AUC** | | |
| --- | --- | --- | --- |
| **Dataset** | **BBBP** | **FEN1** | **CoCrystal** |
| Private local model 1 | 0.570 (0.157) | 0.499 (0.005) | 0.525 (0.190) |
| Private local model 2 | 0.568 (0.156) | 0.498 (0.008) | 0.528 (0.191) |
| Private local model 3 | 0.569 (0.151) | 0.486 (0.006) | 0.528 (0.187) |
| Public local model | 0.843 (0.039) | 0.859 (0.005) | 0.907 (0.010) |
| FedLG (global model) | 0.848 (0.023) | 0.868 (0.017) | 0.917 (0.005) |

**Supplementary Table 12.** Privacy budget settings with different fixed random values from Gaussian distributions for open-access and private institutional databases.

| Dataset | Privacy budget () | |
| --- | --- | --- |
| Open-access database | Private institutional database |
| Molecule number > 2000 | 50.049 | 0.506, 0.500, 0.507 |
| Molecule number 2000 | 50.067 | 0.507, 0.500 |

**Supplementary Table 13.** Performance comparison with and without Bayesian optimization by FedLG method using the MPNN model on molecular property prediction, virtual screening of protein targets and cocrystal material formation prediction tasks.

| **Metrics** | **AUC** | | |
| --- | --- | --- | --- |
| **Dataset** | **BBBP** | **FEN1** | **CoCrystal** |
| FedLG | 0.869 (0.024) | 0.905 (0.019) | 0.943 (0.009) |
| FedLG + Bayesian optimization | 0.895 (0.004) | 0.911 (0.014) | 0.951 (0.001) |

**Supplementary Table 14.** Computational efficiency comparison of all communication rounds with and without Bayesian optimization by FedLG method using the MPNN model on molecular property prediction, virtual screening of protein targets and cocrystal material formation prediction tasks.

| **Computational efficiency** | **Operation time (h)** | | |
| --- | --- | --- | --- |
| **Dataset** | **BBBP** | **FEN1** | **CoCrystal** |
| FedLG | 0.041 (0.008) | 5.320 (0.812) | 0.801 (0.021) |
| FedLG + Bayesian optimization | 8.232 (0.095) | 16.249 (0.606) | 13.973 (0.111) |

**Supplementary Table 15.** Summary of 18 benchmark datasets relevant to molecular property prediction, virtual screening of protein targets, DDI and cocrystal material formation prediction tasks.

| **Database** | **Dataset** | **Size** | **Task** |
| --- | --- | --- | --- |
| **MoleculeNet** | BBBP | 2053 | Classification |
| BACE | 1522 |
| SIDER | 1427 |
| Tox21 | 8014 |
| ToxCast | 8615 |
| ESOL | 1128 | Regression |
| Lipophilicity | 4200 |
| FreeSolv | 643 |
| **LIT-PCBA** | ALDH1 | 108850 | Classification |
| FEN1 | 355771 |
| GBA | 296218 |
| KAT2A | 348742 |
| MAPK1 | 62937 |
| PKM2 | 246069 |
| VDR | 267204 |
| **DrugBank** | DrugBank | 221523 | Classification |
| **BIOSNAP** | BIOSNAP | 41520 | Classification |
| **CoCrystal** | CoCrystal | 7871 | Classification |

**References**

1. Wu, Z. *et al.* MoleculeNet: a benchmark for molecular machine learning. *Chem. Sci.* **9**, 513–530 (2018).

2. Tran-Nguyen, V.-K., Jacquemard, C. & Rognan, D. LIT-PCBA: An Unbiased Data Set for Machine Learning and Virtual Screening. *J. Chem. Inf. Model.* **60**, 4263–4273 (2020).

3. Wishart, D. S. *et al.* DrugBank: a knowledgebase for drugs, drug actions and drug targets. *Nucleic Acids Res.* **36**, D901–D906 (2008).

4. Huang, K., Xiao, C., Hoang, T., Glass, L. & Sun, J. CASTER: Predicting Drug Interactions with Chemical Substructure Representation. *Proc. AAAI Conf. Artif. Intell.* **34**, 702–709 (2020).

5. Jiang, Y. *et al.* Coupling complementary strategy to flexible graph neural network for quick discovery of coformer in diverse co-crystal materials. *Nat. Commun.* **12**, 5950 (2021).

6. Groom, C. R., Bruno, I. J., Lightfoot, M. P. & Ward, S. C. The Cambridge Structural Database. *Acta Crystallogr. Sect. B Struct. Sci. Cryst. Eng. Mater.* **72**, 171–179 (2016).

7. Gilmer, J., Schoenholz, S. S., Riley, P. F., Vinyals, O. & Dahl, G. E. Neural Message Passing for Quantum Chemistry. Preprint at http://arxiv.org/abs/1704.01212 (2017).

8. Veličković, P. *et al.* Graph Attention Networks. Preprint at http://arxiv.org/abs/1710.10903 (2018).

9. Kipf, T. N. & Welling, M. Semi-supervised classification with graph convolutional networks. Preprint at https://arxiv.org/abs/1609.02907 (2017).

10. Kingma, D. P. & Ba, J. Adam: A Method for Stochastic Optimization. Preprint at http://arxiv.org/abs/1412.6980 (2017).
